# Supplementary material
Source: PubMed Central journal article supplement (PMC6207214)

**SUPPLEMENTAL MATERIAL**

**Supplemental Figure 1. Flowchart of the Analytic Cohort.** <sup>1</sup>Rates of outcomes are inverse propensity weighted to account for missing data

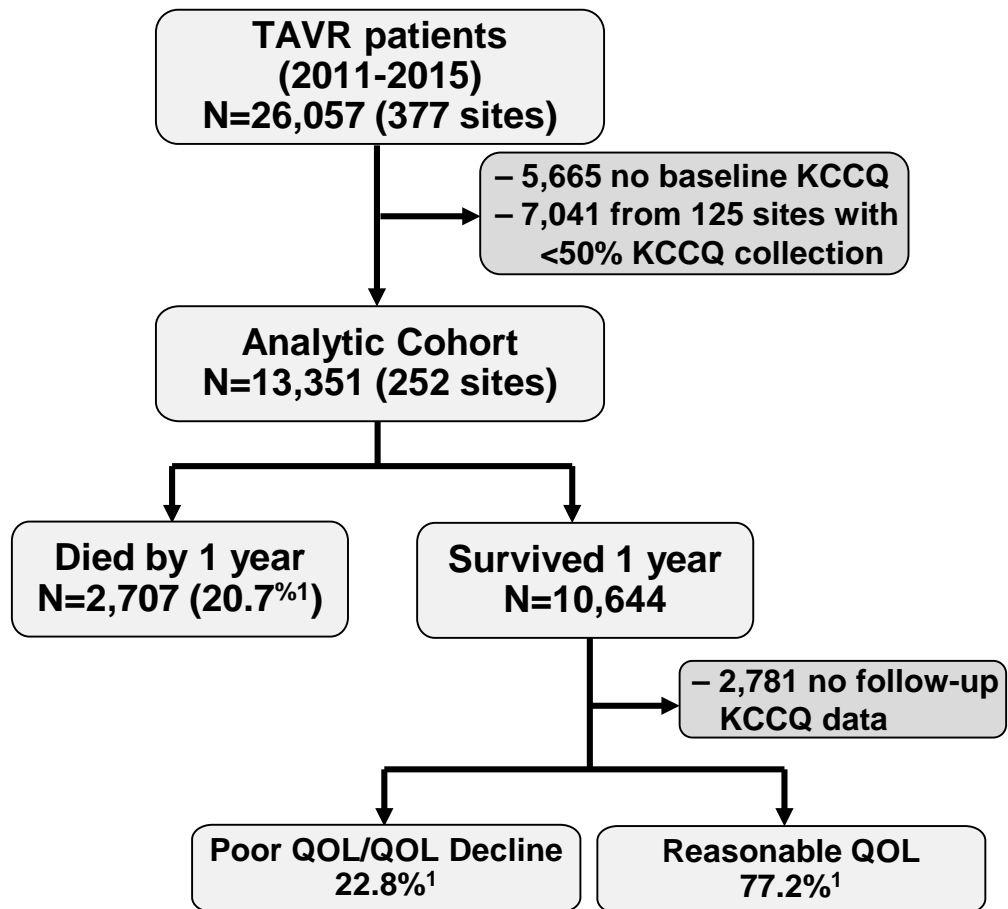

**Supplemental Table 1. Characteristics of patients treated at included versus excluded sites**

|                                              | <b>Included Sites<br/>(n=245 sites;<br/>10,570 patients)</b> | <b>Excluded Sites<br/>(n=125 sites;<br/>7,041 patients)</b> | <b>Standardized<br/>difference/<br/>p-value</b> |
|----------------------------------------------|--------------------------------------------------------------|-------------------------------------------------------------|-------------------------------------------------|
| Teaching hospital                            | 60.8%                                                        | 68.8%                                                       | 16.8%                                           |
| Number of beds                               | 500 (368, 685)                                               | 550 (408, 714)                                              | 0.076                                           |
| Annual TAVR volume                           | 17 (11, 26)                                                  | 21 (12, 34)                                                 | 0.015                                           |
| Age (years)                                  | 84 (79, 88)                                                  | 84 (79, 88)                                                 | 0.222                                           |
| Female sex                                   | 48.5%                                                        | 48.1%                                                       | 0.8%                                            |
| White race                                   | 95.9%                                                        | 95.2%                                                       | 3.4%                                            |
| STS mortality risk score (%)                 | 6.8 (4.5, 10.3)                                              | 6.9 (4.6, 10.5)                                             | 0.247                                           |
| <4%                                          | 18.9%                                                        | 18.6%                                                       | 0.8%                                            |
| 4-8%                                         | 41.6%                                                        | 41.3%                                                       | 0.6%                                            |
| >8%                                          | 39.5%                                                        | 40.1%                                                       | 1.2%                                            |
| Coronary artery disease                      | 64.8%                                                        | 62.2%                                                       | 5.4%                                            |
| Prior open heart surgery                     | 32.6%                                                        | 31.6%                                                       | 2.1%                                            |
| Previous stroke                              | 12.0%                                                        | 11.7%                                                       | 0.9%                                            |
| Peripheral arterial disease                  | 31.3%                                                        | 31.9%                                                       | 1.3%                                            |
| Severe chronic lung disease                  | 13.4%                                                        | 13.5%                                                       | 0.3%                                            |
| Home oxygen                                  | 12.4%                                                        | 13.2%                                                       | 2.4%                                            |
| Renal function                               |                                                              |                                                             |                                                 |
| Dialysis dependent                           | 3.9%                                                         | 4.0%                                                        | 0.5%                                            |
| Creatinine $\geq$ 2.0 mg/dL without dialysis | 6.1%                                                         | 6.3%                                                        | 0.8%                                            |
| Creatinine <2.0 mg/dL                        | 90.0%                                                        | 89.7%                                                       | 1.0%                                            |
| Atrial fibrillation                          | 43.1%                                                        | 42.8%                                                       | 0.6%                                            |
| Permanent pacemaker/ICD                      | 19.1%                                                        | 20.5%                                                       | 3.5%                                            |
| LV ejection fraction                         |                                                              |                                                             |                                                 |
| <30%                                         | 7.0%                                                         | 7.0%                                                        | 0.0%                                            |
| 30-45%                                       | 18.3%                                                        | 18.1%                                                       | 0.5%                                            |
| >45%                                         | 74.7%                                                        | 74.9%                                                       | 0.5%                                            |
| Mean aortic gradient (mmHg)                  | 43 (35, 51)                                                  | 42 (34, 51)                                                 |                                                 |
| Moderate/severe mitral regurgitation         | 32.8%                                                        | 31.5%                                                       | 2.8%                                            |
| KCCQ-OS                                      | 39 (23, 58)                                                  | 38 (23, 57)                                                 | 0.023                                           |

Continuous variables are presented as median (IQR) and compared using the Wilcoxon Rank Sum Test. STS, Society of Thoracic Surgeons; ICD, implantable cardiac defibrillator; LV, left ventricular; KCCQ-OS, Kansas City Cardiomyopathy Questionnaire-overall summary score

**Supplemental Table 2. Baseline characteristics of patients who survived 1 year based on availability of follow-up KCCQ data**

|                                      | <b>Data Available<br/>n=7,863</b> | <b>Missing Data<br/>n=2,701</b> | <b>Standardized<br/>difference/p-value</b> |
|--------------------------------------|-----------------------------------|---------------------------------|--------------------------------------------|
| Age (years)                          | 84 (79, 88)                       | 84 (79, 88)                     | 0.999                                      |
| Female sex                           | 49.4%                             | 52.6%                           | 6.4%                                       |
| White race                           | 95.9%                             | 94.9%                           | 4.8%                                       |
| STS mortality risk score (%)         | 6.3 (4.3, 9.4)                    | 6.9 (4.5, 10.3)                 | <0.001                                     |
| <4%                                  | 21.8%                             | 18.7%                           | 7.7%                                       |
| 4-8%                                 | 44.2%                             | 41.6%                           | 5.3%                                       |
| >8%                                  | 34.0%                             | 39.7%                           | 11.8%                                      |
| Coronary artery disease              | 64.6%                             | 61.9%                           | 5.6%                                       |
| Prior open heart surgery             | 33.0%                             | 31.6%                           | 3.0%                                       |
| Previous stroke                      | 11.6%                             | 11.5%                           | 0.3%                                       |
| Peripheral arterial disease          | 29.8%                             | 29.5%                           | 0.7%                                       |
| Severe chronic lung disease          | 0.114                             | 0.141                           | 8.1%                                       |
| Home oxygen                          | 10.5%                             | 10.9%                           | 1.3%                                       |
| Renal function                       |                                   |                                 |                                            |
| Dialysis dependent                   | 2.9%                              | 3.1%                            | 1.2%                                       |
| Cr $\geq$ 2.0 mg/dL without dialysis | 4.9%                              | 5.8%                            | 4.0%                                       |
| Cr <2.0 mg/dL                        | 92.2%                             | 91.0%                           | 4.3%                                       |
| Atrial fibrillation                  | 40.1%                             | 41.4%                           | 2.6%                                       |
| Permanent pacemaker/ICD              | 18.3%                             | 18.3%                           | 0.0%                                       |
| LV ejection fraction                 |                                   |                                 |                                            |
| <30%                                 | 6.1%                              | 6.4%                            | 1.2%                                       |
| 30-45%                               | 17.3%                             | 18.6%                           | 3.4%                                       |
| >45%                                 | 76.6%                             | 75.0%                           | 3.7%                                       |
| Mean aortic gradient (mmHg)          | 43 (36, 52)                       | 43 (36, 53)                     | 0.070                                      |
| Moderate/severe mitral regurgitation | 31.5%                             | 33.1%                           | 3.4%                                       |
| Baseline KCCQ-OS                     | 41.7 (25.0, 60.9)                 | 39.1 (24.0, 57.3)               | <0.001                                     |

STS, Society of Thoracic Surgeons; ICD, implantable cardiac defibrillator; LV, left ventricular; KCCQ-OS, Kansas City Cardiomyopathy Questionnaire-overall summary score

**Supplemental Table 3. Examples of How to Calculate Estimated Risk for Poor Outcome**

|                                             | <b>Model coefficients</b> | <b>Patient 1 (high risk)</b> | <b>Patient 2 (low risk)</b> | <b>Patient 3 (medium risk)</b> |
|---------------------------------------------|---------------------------|------------------------------|-----------------------------|--------------------------------|
| Intercept                                   | 0.0022                    |                              |                             |                                |
| KCCQ-overall summary score                  | -0.0151                   | 25 points (NYHA IV)          | 65 points (NYHA II)         | 50 points (NYHA III)           |
| Mean aortic valve gradient                  | -0.0039                   | 30 mmHg                      | 50 mmHg                     | 40 mmHg                        |
| Home oxygen                                 | 0.6007                    | 1 (yes)                      | 0 (no)                      | 0 (no)                         |
| Creatinine                                  | 0.1733                    | 2.5 mg/dL                    | 1 mg/dL                     | 1.3 mg/dL                      |
| Atrial fibrillation/flutter                 | 0.3529                    | 1 (yes)                      | 0 (no)                      | 1 (yes)                        |
| Diabetes mellitus                           | 0.0704                    | 0 (no)                       | 0 (no)                      | 0 (no)                         |
| Estimated Risk of Poor Outcome <sup>1</sup> |                           | 0.710                        | 0.269                       | 0.418                          |

<sup>1</sup>Estimated Risk=1/(1+e<sup>-(intercept+coefficient A\*value A+coefficient B\*value B+...))</sup>)

**Supplemental Figure 2. Calibration of the Poor Outcome Risk Model.** (A) Model without inverse propensity weighting. (B) Model with inverse propensity weighting. The plots show predicted risk of poor outcome by deciles plotted against the observed rate of poor outcome in each decile. The red dashed line represents the regression line for the deciles; the blue line is the regression line forced through the 0 intercept; and the green line is the line of unity (i.e., perfect calibration). The statistical tests compare the red dashed and green lines.

(A)

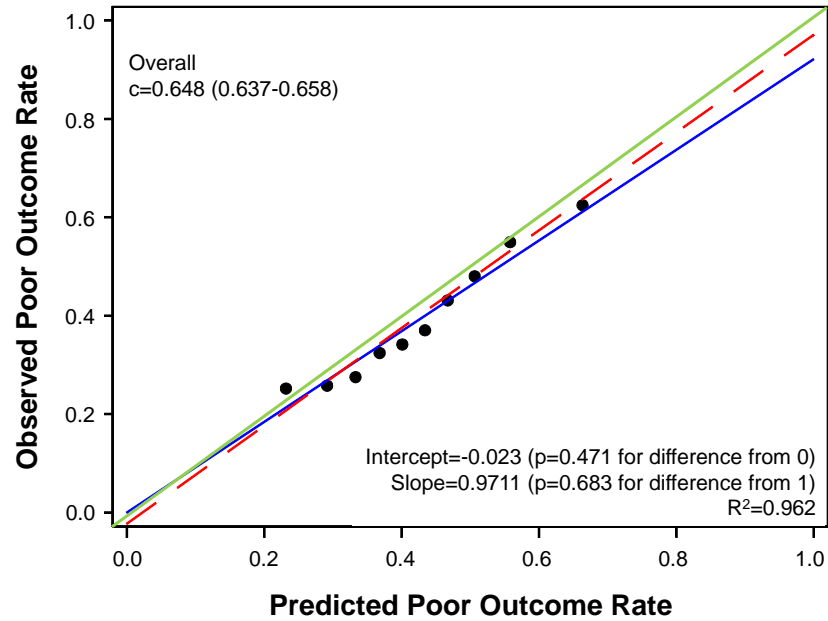

(B)

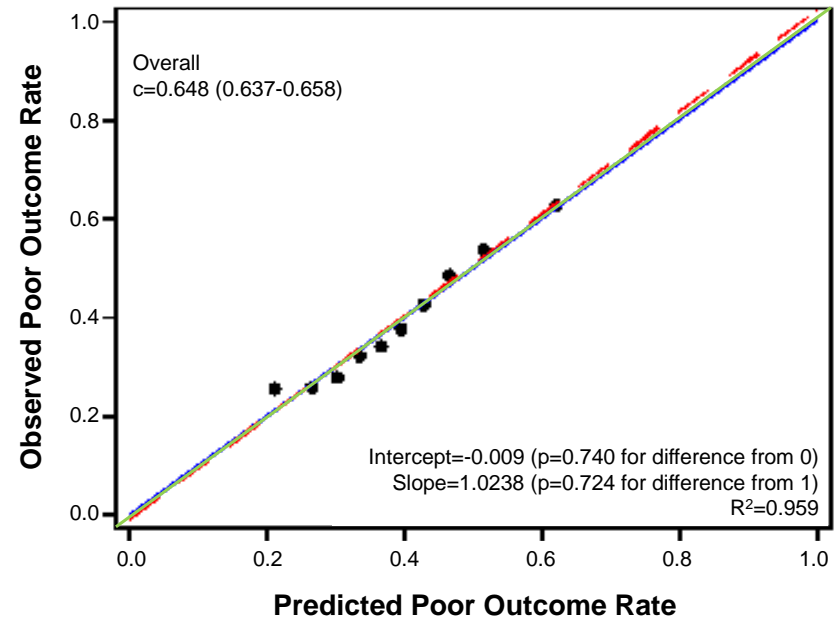

**Supplemental Figure 3. Calibration of the Poor Outcome Risk Model.** (A) Model in patients <85 years of age. (B) Model in patients  $\geq 85$  years of age.

(A)

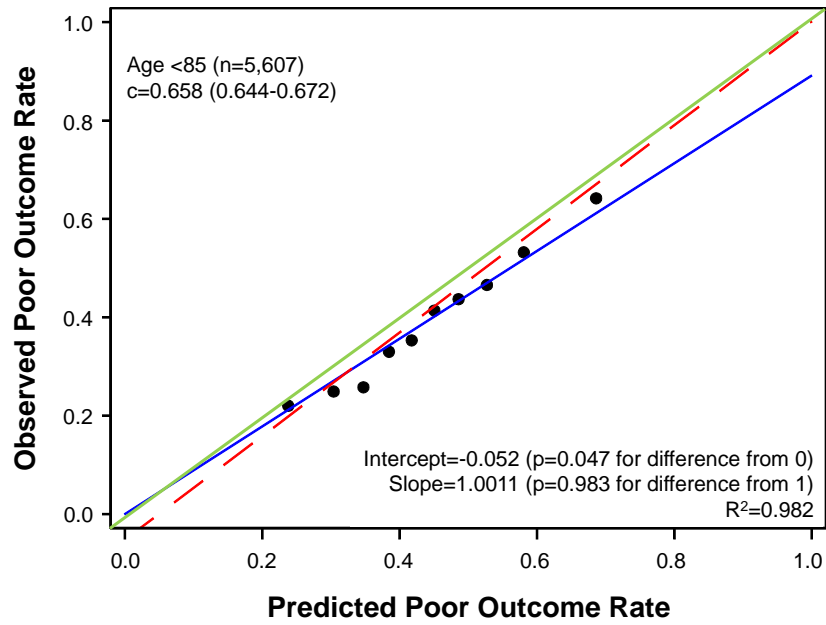

(B)

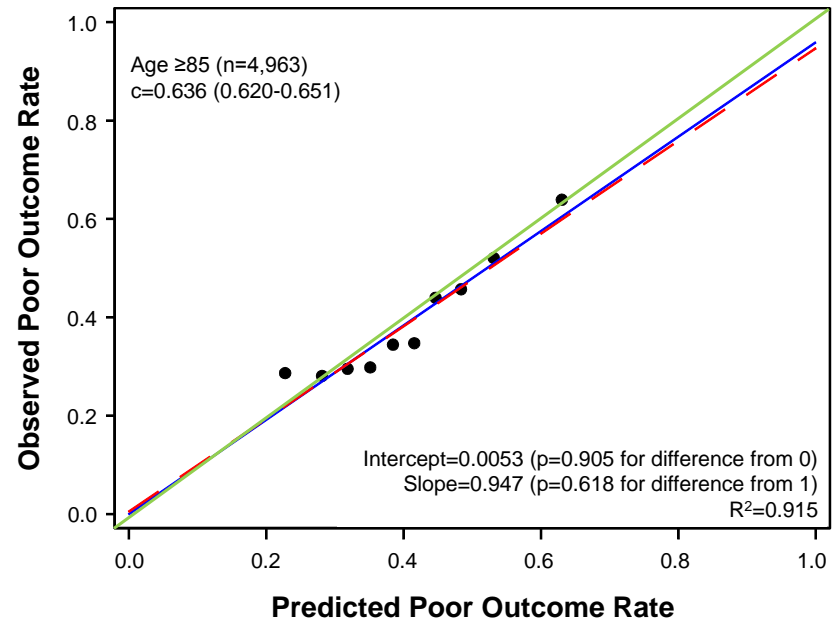

**Supplemental Figure 4. Calibration of the Poor Outcome Risk Model.** (A) Model in male patients. (B) Model in female patients.

(A)

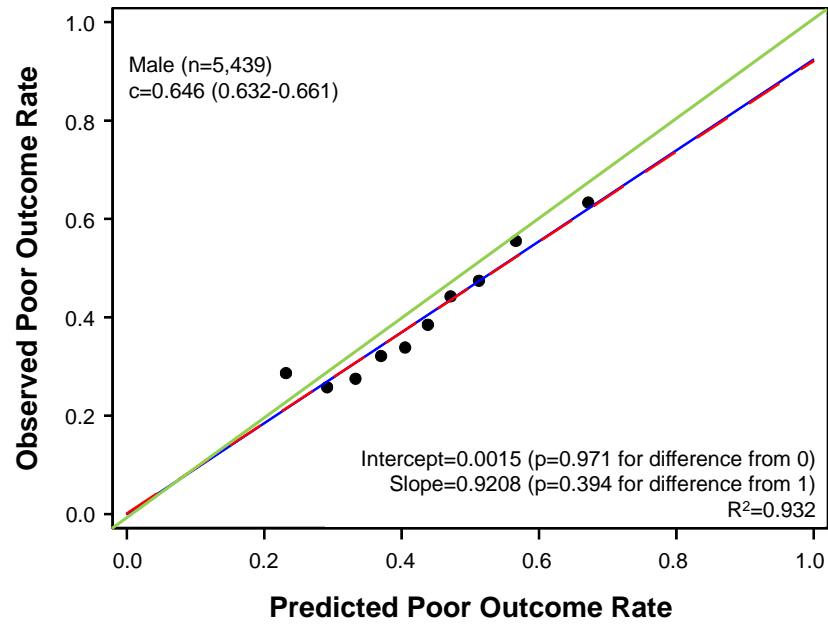

(B)

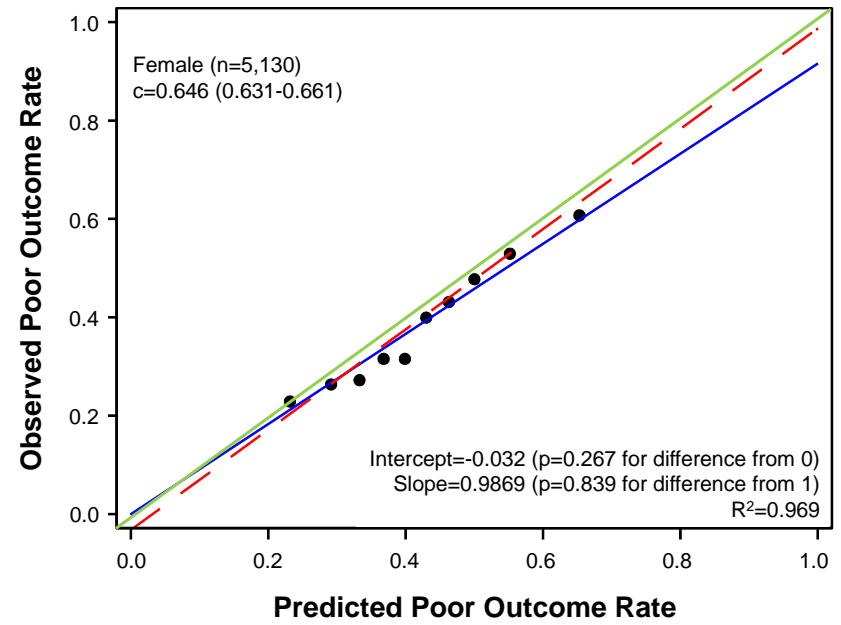



**Supplemental Figure 5. Calibration of the Poor Outcome Risk Model.** (A) Model in patients with left ventricular ejection <35%. (B) Model in patients with left ventricular ejection  $\geq$ 35%.

(A)

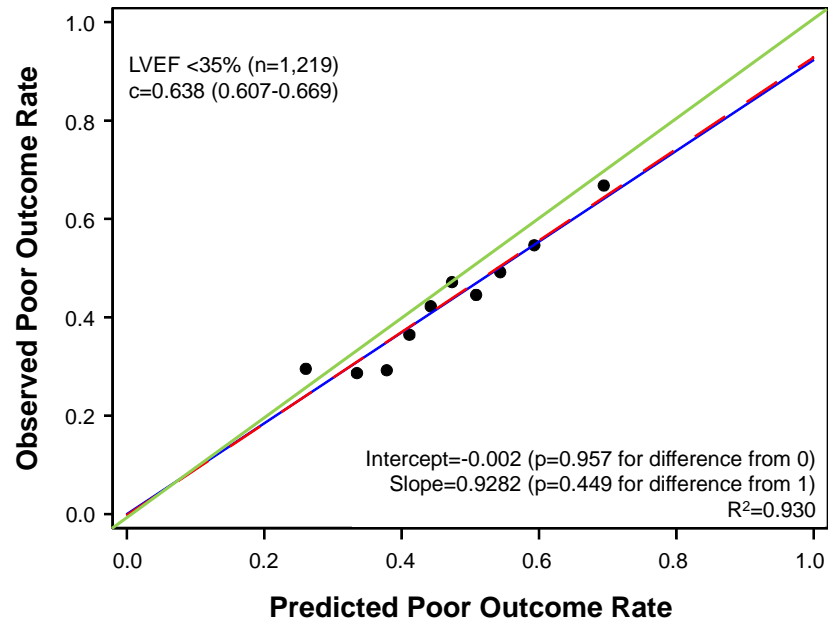

(B)

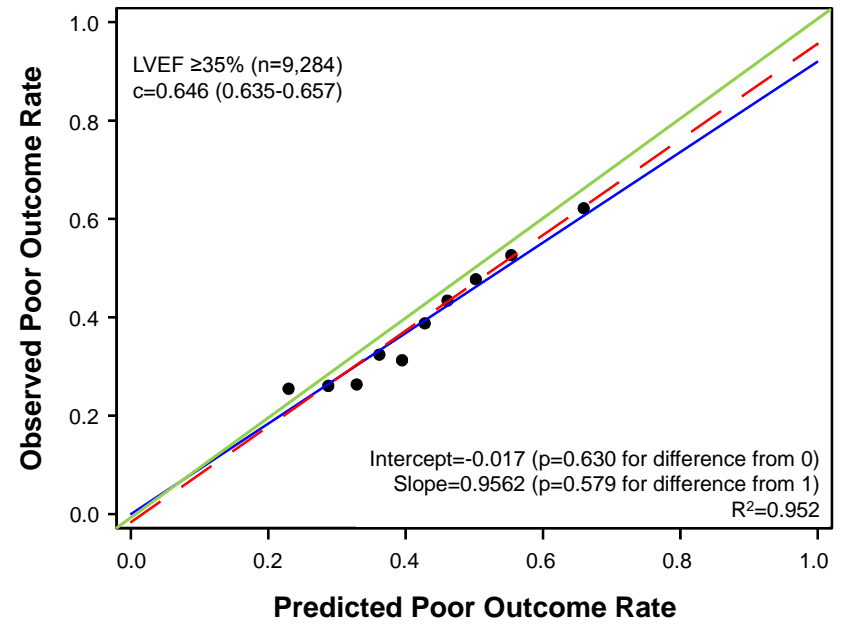

**Supplemental Figure 6. Calibration of the Poor Outcome Risk Model.** (A) Model in patients with NYHA I-III functional status. (B) Model in patients with NYHA IV functional status.

(A)

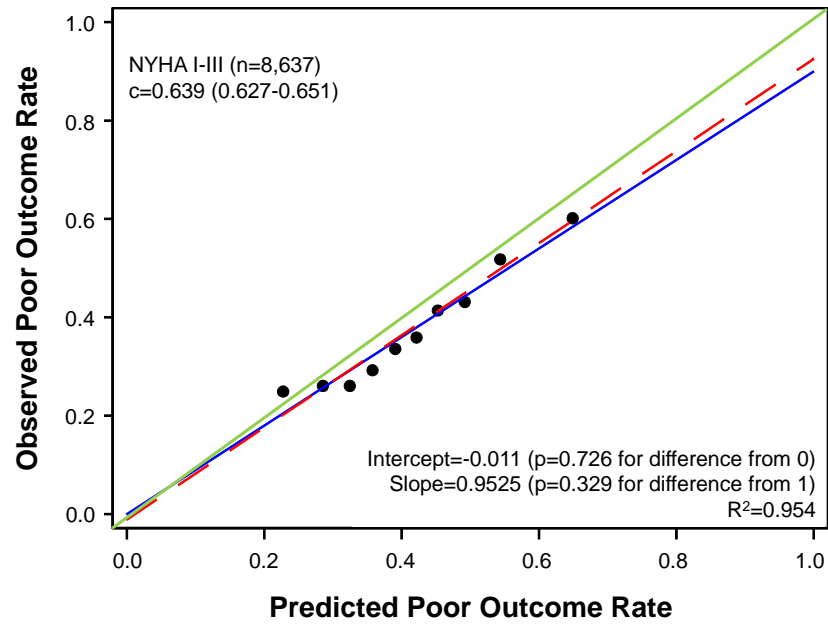

(B)

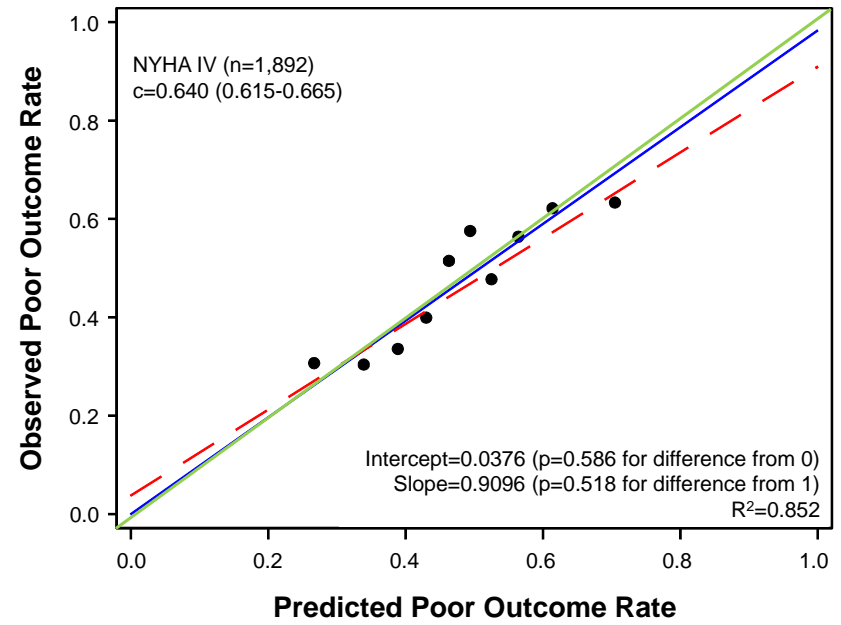

**Supplemental Figure 7. Calibration of the Poor Outcome Risk Model.** (A) Model in patients who underwent elective TAVR. (B) Model in patients who underwent TAVR with urgent/shock/emergent acuity.

(A)

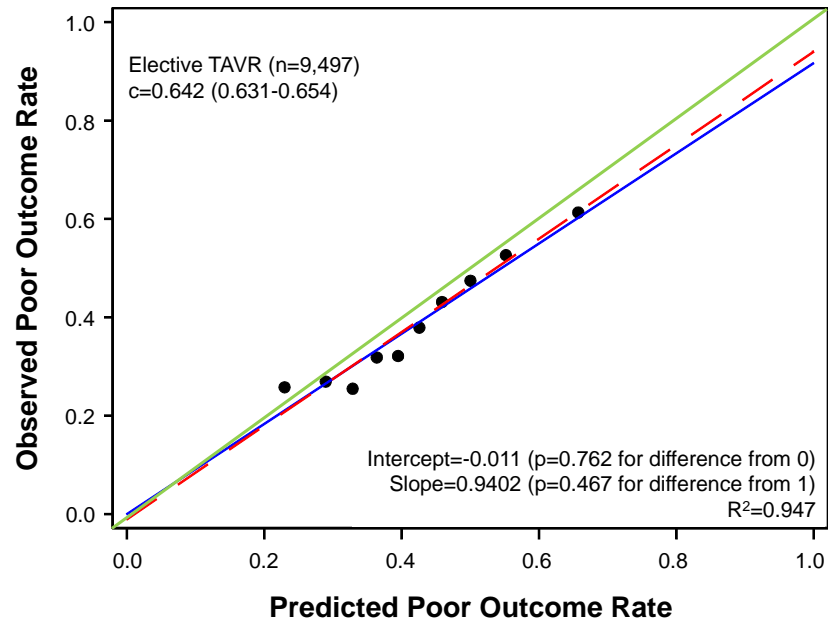

(B)

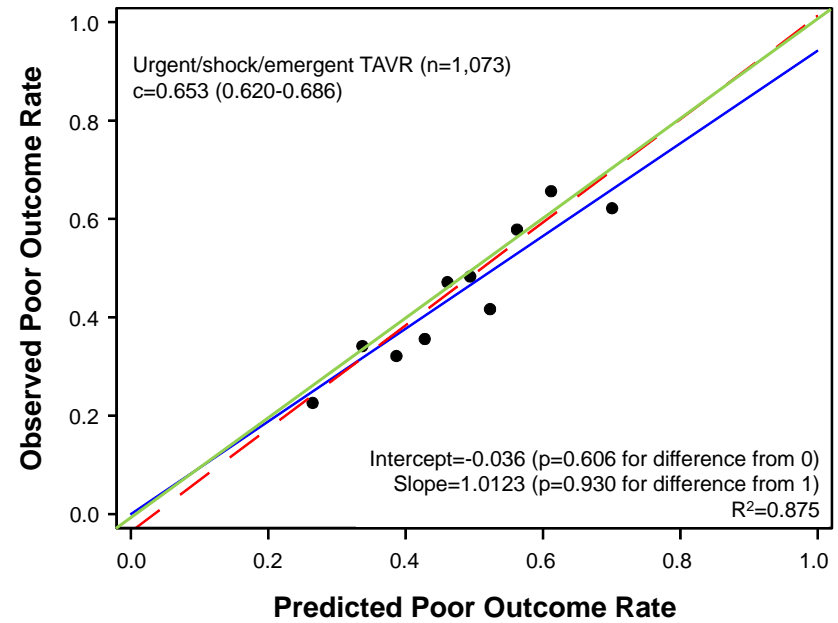

**Supplemental Figure 8. Calibration of the Poor Outcome Risk Model.** (A) Model in patients with STS mortality risk <4%. (B) Model in patients with STS mortality risk 4-8%. (C) Model in patients with STS mortality risk >8%.

(A)

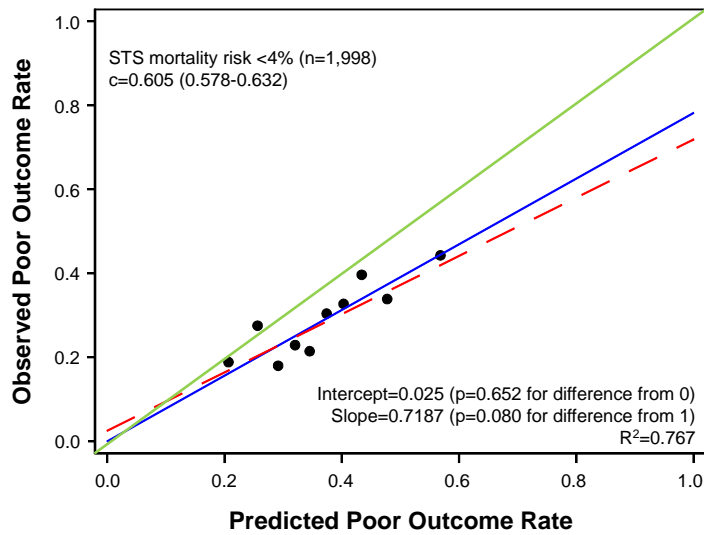

(B)

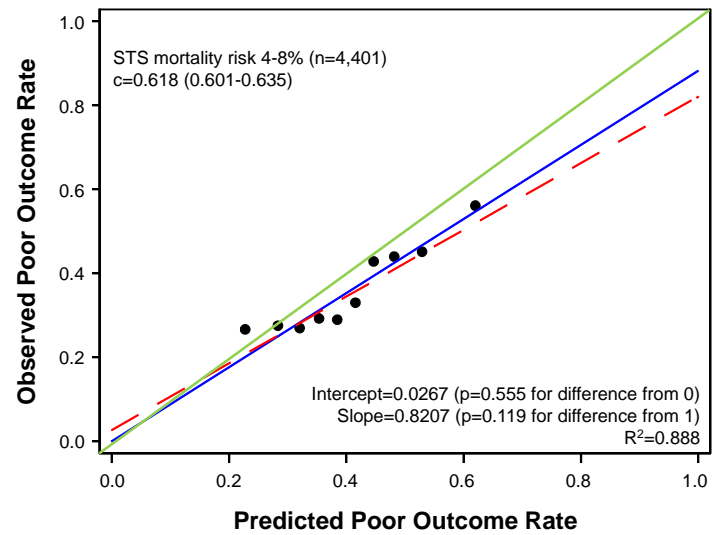

(C)

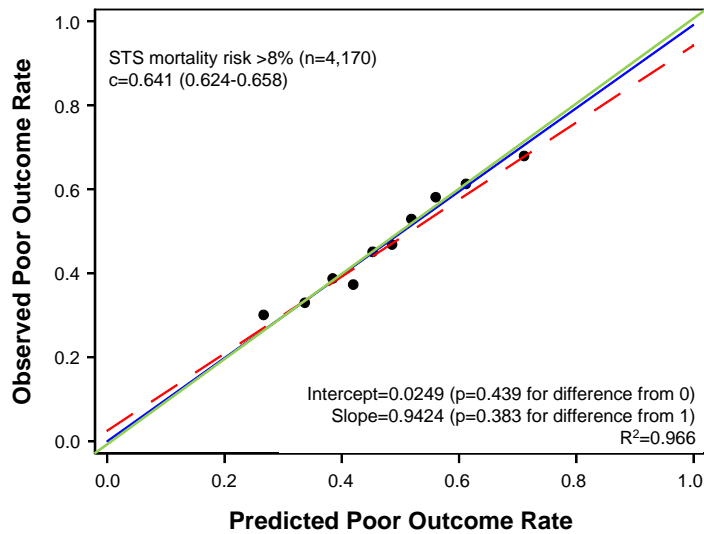

Supplemental Figure 9. Calibration of the Poor Outcome Risk Model in Patients Treated On/After January 1, 2014

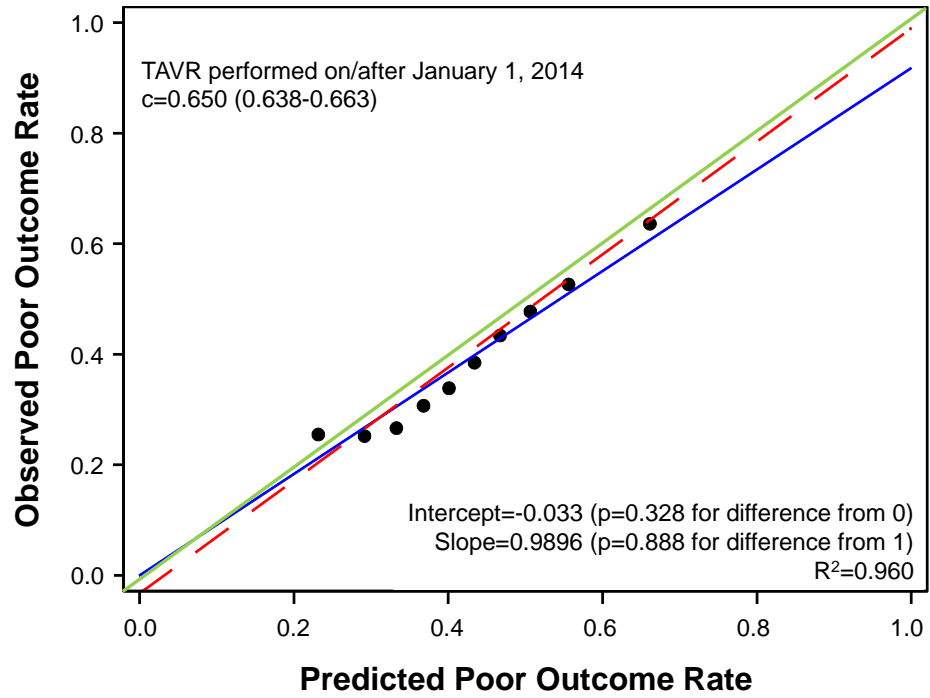

Supplement: NIHMS1505366-supplement-Supplemental_Material_2.pdf [file NIHMS1505366-supplement-Supplemental_Material_2.pdf]
