# Supplementary material
Source: PubMed Central journal article supplement (PMC6207214)
Supplement: NIHMS1505366-supplement-Supplemental_Material_1.pdf [file NIHMS1505366-supplement-Supplemental_Material_1.pdf]

STROBE Statement—checklist of items that should be included in reports of observational studies

|                              | Item No | Page #          | Recommendation                                                                                                                                                                                    |
|------------------------------|---------|-----------------|---------------------------------------------------------------------------------------------------------------------------------------------------------------------------------------------------|
| <b>Title and abstract</b>    | 1       | 2               | (a) Indicate the study’s design with a commonly used term in the title or the abstract                                                                                                            |
|                              |         | 2               | (b) Provide in the abstract an informative and balanced summary of what was done and what was found                                                                                               |
| <b>Introduction</b>          |         |                 |                                                                                                                                                                                                   |
| Background/rationale         | 2       | 4               | Explain the scientific background and rationale for the investigation being reported                                                                                                              |
| Objectives                   | 3       | 4               | State specific objectives, including any prespecified hypotheses                                                                                                                                  |
| <b>Methods</b>               |         |                 |                                                                                                                                                                                                   |
| Study design                 | 4       | 5               | Present key elements of study design early in the paper                                                                                                                                           |
| Setting                      | 5       | 5               | Describe the setting, locations, and relevant dates, including periods of recruitment, exposure, follow-up, and data collection                                                                   |
| Participants                 | 6       | 5               | <i>Cohort study</i> —Give the eligibility criteria, and the sources and methods of selection of participants. Describe methods of follow-up                                                       |
| Variables                    | 7       | 5-8,<br>Table 2 | Clearly define all outcomes, exposures, predictors, potential confounders, and effect modifiers. Give diagnostic criteria, if applicable                                                          |
| Data sources/<br>measurement | 8*      | 5               | For each variable of interest, give sources of data and details of methods of assessment (measurement). Describe comparability of assessment methods if there is more than one group              |
| Bias                         | 9       | 6-7             | Describe any efforts to address potential sources of bias                                                                                                                                         |
| Study size                   | 10      | 7               | Explain how the study size was arrived at                                                                                                                                                         |
| Quantitative variables       | 11      | 7-8             | Explain how quantitative variables were handled in the analyses. If applicable, describe which groupings were chosen and why                                                                      |
| Statistical methods          | 12      | 7-9             | (a) Describe all statistical methods, including those used to control for confounding                                                                                                             |
|                              |         | 8               | (b) Describe any methods used to examine subgroups and interactions                                                                                                                               |
|                              |         | 6-7             | (c) Explain how missing data were addressed                                                                                                                                                       |
|                              |         | 6-7             | (d) <i>Cohort study</i> —If applicable, explain how loss to follow-up was addressed                                                                                                               |
|                              |         | 8               | (e) Describe any sensitivity analyses                                                                                                                                                             |
| <b>Results</b>               |         |                 |                                                                                                                                                                                                   |
| Participants                 | 13*     | 9               | (a) Report numbers of individuals at each stage of study—eg numbers potentially eligible, examined for eligibility, confirmed eligible, included in the study, completing follow-up, and analysed |
|                              |         | 9               | (b) Give reasons for non-participation at each stage                                                                                                                                              |
|                              |         | eFigure 1       | (c) Consider use of a flow diagram                                                                                                                                                                |
| Descriptive data             | 14*     | Table 1         | (a) Give characteristics of study participants (eg demographic, clinical, social) and information on exposures and potential confounders                                                          |
|                              |         | 9               | (b) Indicate number of participants with missing data for each variable of interest                                                                                                               |

|                          |     |             |                                                                                                                                                                                                              |
|--------------------------|-----|-------------|--------------------------------------------------------------------------------------------------------------------------------------------------------------------------------------------------------------|
|                          |     | NA          | (c) <i>Cohort study</i> —Summarise follow-up time (eg, average and total amount)                                                                                                                             |
| Outcome data             | 15* | 9           | <i>Cohort study</i> —Report numbers of outcome events or summary measures over time                                                                                                                          |
| Main results             | 16  | 9           | (a) Give unadjusted estimates and, if applicable, confounder-adjusted estimates and their precision (eg, 95% confidence interval). Make clear which confounders were adjusted for and why they were included |
|                          |     | Table 1     | (b) Report category boundaries when continuous variables were categorized                                                                                                                                    |
|                          |     | NA          | (c) If relevant, consider translating estimates of relative risk into absolute risk for a meaningful time period                                                                                             |
| Other analyses           | 17  | eFigure 3-9 | Report other analyses done—eg analyses of subgroups and interactions, and sensitivity analyses                                                                                                               |
| <b>Discussion</b>        |     |             |                                                                                                                                                                                                              |
| Key results              | 18  | 11          | Summarise key results with reference to study objectives                                                                                                                                                     |
| Limitations              | 19  | 12-14       | Discuss limitations of the study, taking into account sources of potential bias or imprecision. Discuss both direction and magnitude of any potential bias                                                   |
| Interpretation           | 20  | 11-14       | Give a cautious overall interpretation of results considering objectives, limitations, multiplicity of analyses, results from similar studies, and other relevant evidence                                   |
| Generalisability         | 21  | 13          | Discuss the generalisability (external validity) of the study results                                                                                                                                        |
| <b>Other information</b> |     |             |                                                                                                                                                                                                              |
| Funding                  | 22  | 14          | Give the source of funding and the role of the funders for the present study and, if applicable, for the original study on which the present article is based                                                |
